# Supplementary material for: Adsorption of water and n-hexane on pristine and oxidized carbon nanotube supports of cobalt-based Fischer–Tropsch catalysts
Source: Royal Society of Chemistry journal article supplement (doi:10.1039/c9cp01287g), 2019-01-01
Supplement: c9cp01287g1.pdf [file c9cp01287g1.pdf]

# Supplementary Material

For the article

## Adsorption of Water and *n*-Hexane on Pristine and Oxidized Carbon Nanotube Supports of Cobalt-Based Fischer-Tropsch Catalysts

*Sergei A. Chernyak\*, Natalia E. Strokova, Elizaveta S. Fedorova, Anton S. Ivanov,*

*Konstantin I. Maslakov, Serguei V. Savilov, and Valery V. Lunin*

Department of Chemistry, Lomonosov Moscow State University, Leninskie Gory 1-3, Moscow, 119991,

Russia

[\\*chernyak.msu@gmail.com](mailto:*chernyak.msu@gmail.com)

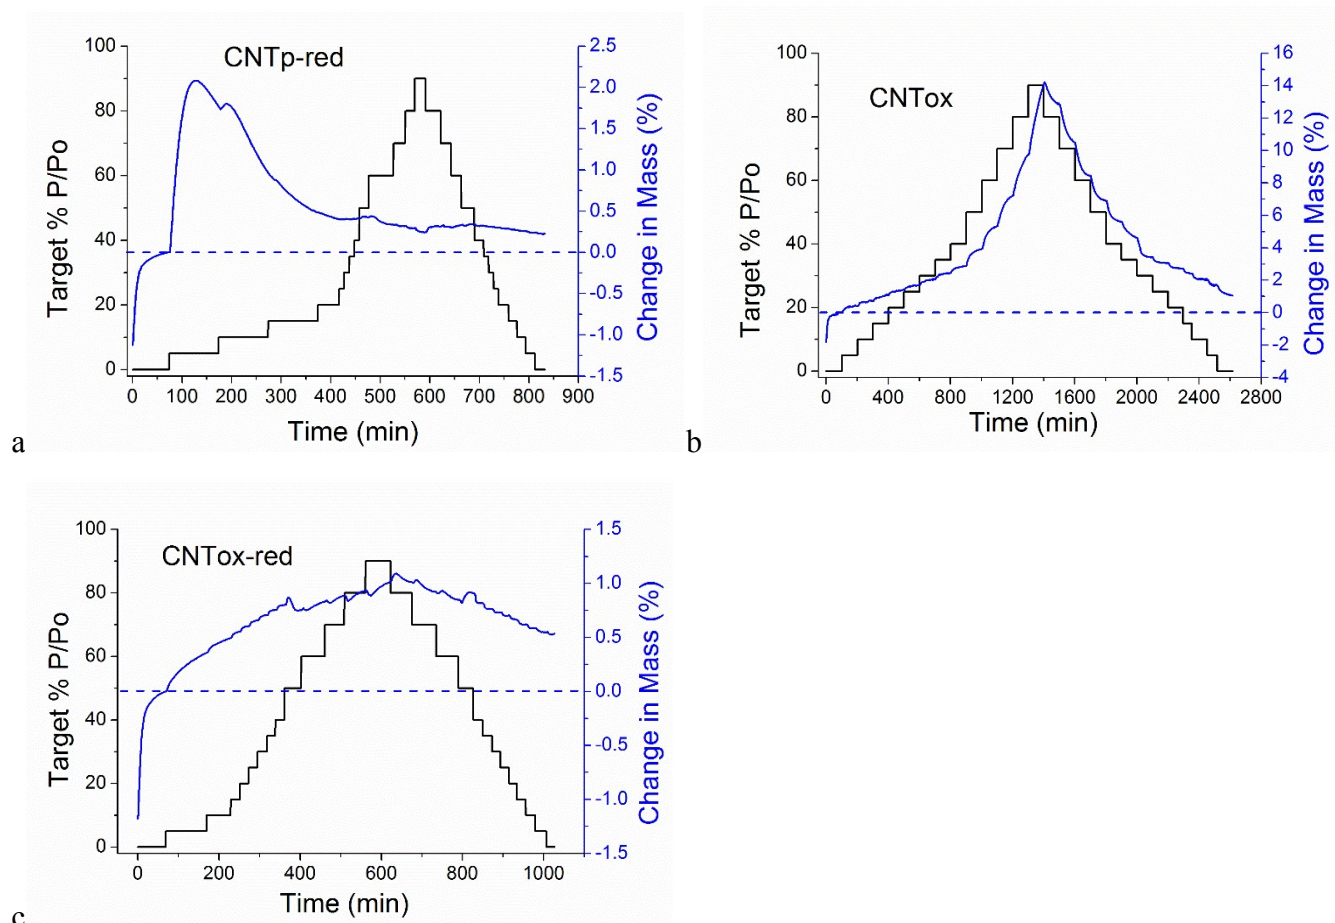

Fig. S1. Kinetics of water adsorption for the studied samples. The reference mass ( $m_0$ ) for calculation of the change in mass was fixed at the end of  $p/p_0=0$  step. The initial negative change in mass reflects the measured weight gain of the sample during heating up to 200°C.
